# Supplementary material for: Uncovering the oxic-suboxic microenvironment change in seamount flank through authigenic clay minerals in basaltic substrate of ferromanganese crust, Magellan seamount
Source: Frontiers journal article supplement (doi:10.3389/fmars.2024.1481396), 2024-10-22
Supplement: Table_1.docx [file Table_1.docx]

Supplementary Material

# Co chronometry

The Be chronometry provides highly reliable age estimates but is limited to ages up to ~10 Ma owing to its relatively short half-life (15 My) (Frank et al., 2002). To address this limitation, the Co chronometry is commonly used. The empirical equation for Co age dating proposed in previous studies is based on correlations with 10Be dating results (Puteanus and Halbach, 1988). However, the 10Be/9Be ratio, which is controlled by 10Be, varies depending on the water mass (Frank et al., 2002; Ku et al., 1990); thus, it is necessary to verify whether the ratio can be applied to the study area of interest. In this study, the 10Be ages of Fe-Mn crusts from a nearby seamount (KC-8) were obtained and a modified empirical formula for the Co chronometry was applied. Equation was (Eq.1), which is differs from the previous proposed by Manheim and Lane-Bostwick, (1988) (Moon, 2016).

(Manheim and Lane-Bostwick, 1988)

For the lower parts of the Fe-Mn crust, where Fe, Mn, and Co depletion are expected due to phosphatization (analysis point 7-10), the equation suggested by Puteanus and Halbach, (1988) was applied. The Co content used in the equation was corrected by P content and Mn/Co ratio.

(Puteanus and Halbach, 1988)

# Supplementary Tables

**Supplementary Table 1.** Elements concentrations of the Fe-Mn crust (DGCR1314U01).

| Analysis point | Co (ppm) | Fe (wt.%) | Mn (wt.%) | P (wt. %) |
| --- | --- | --- | --- | --- |
| 1 | 4497 | 16.48 | 18.30 | 0.50 |
| 2 | 4154 | 15.70 | 17.38 | 0.41 |
| 3 | 7016 | 16.69 | 26.26 | 0.39 |
| 4 | 6016 | 16.24 | 25.79 | 0.37 |
| 5 | 4220 | 17.60 | 22.68 | 0.40 |
| 6 | 7159 | 17.26 | 27.34 | 0.47 |
| 7 | 6143 | 9.95 | 26.48 | 1.49 |
| 8 | 3961 | 7.35 | 23.46 | 3.51 |
| 9 | 2535 | 6.55 | 17.57 | 5.33 |
| 10 | 2357 | 4.48 | 13.85 | 6.12 |

**Supplementary Table 2.** Ages of the layers in the Fe-Mn crust (DGCR1314U01).

| Analysis point | Top (mm) | Bottom (mm) | Depth (mm) | Thickness (mm) | Growth Rate (mm/Ma) | Age (Ma) |
| --- | --- | --- | --- | --- | --- | --- |
| 1 | 0 | 10 | 5 | 10 | 3.52 | 2.84 |
| 2 | 10 | 20 | 15 | 10 | 3.7 | 5.54 |
| 3 | 20 | 30 | 25 | 10 | 2.38 | 9.74 |
| 4 | 30 | 40 | 35 | 10 | 2.97 | 13.1 |
| 5 | 40 | 50 | 45 | 10 | 5.01 | 15.1 |
| 6 | 50 | 60 | 55 | 10 | 2.45 | 19.18 |
| 7 | 60 | 75 | 67.5 | 15 | 2.06 | 26.45 |
| 8 | 75 | 85 | 80 | 10 | 2.69 | 30.17 |
| 9 | 85 | 95 | 90 | 10 | 3.11 | 33.39 |
| 10 | 95 | 110 | 102.5 | 15 | 7.39 | 40.78 |

# References

Frank, M. (2002). Radiogenic isotopes: Tracers of past ocean circulation and erosional input. *Rev. Geophys.* 40(1), 1-1. doi: 10.1029/2000RG000094

Ku, T. L., Kusakabe, M., Measures, C. I., Southon, J. R., Cusimano, G., Vogel, J. S., ... & Nakaya, S. (1990). Beryllium isotope distribution in the western North Atlantic: a comparison to the Pacific. *Deep Sea Res. Part A.* 37(5), 795-808. doi: 10.1016/0198-0149(90)90007-I

Moon, J.W. (2016). Exploration for Seafloor Hydrothermal Deposits and Fe-Mn Crusts in the Southwestern Pacific and the Indian Ocean. 147-149. https://sciwatch.kiost.ac.kr/handle/2020.kiost/38061?mode=full

Puteanus, D. and Halbach, P. (1988). Correlation of Co concentration and growth rate—A method for age determination of ferromanganese crusts. *Chem. Geol.* 69(1-2), 73-85. doi: 10.1016/0009-2541(88)90159-3

Manheim, F. T., & Lane-Bostwick, C. M. (1988). Cobalt in ferromanganese crusts as a monitor of hydrothermal discharge on the Pacific sea floor. *Nature*, 335(6185), 59-62. doi: 10.1038/335059a0
